# Supplementary material for: Lipidomic dysregulation within the lung parenchyma following whole-thorax lung irradiation: Markers of injury, inflammation and fibrosis detected by MALDI-MSI
Source: PubMed Central journal article supplement (PMC5583385; doi:10.1038/s41598-017-10396-w), 2017-09-04
Supplement: 41598_2017_10396_MOESM1_ESM.pdf [file 41598_2017_10396_MOESM1_ESM.pdf]

**Lipidomic dysregulation within the lung parenchyma following whole-thorax lung irradiation: Markers of injury, inflammation and fibrosis detected by MALDI-MSI**

Claire L. Carter<sup>1</sup>, Jace W. Jones<sup>1</sup>, Ann M. Farese<sup>2</sup>, Thomas J. MacVittie<sup>2</sup>, and Maureen A. Kane<sup>1\*</sup>

<sup>1</sup>University of Maryland, School of Pharmacy, Department of Pharmaceutical Sciences and <sup>2</sup>University of Maryland, School of Medicine, Department of Radiation Oncology, Baltimore, MD 21201

**Correspondence:**

Maureen A. Kane  
University of Maryland, School of Pharmacy  
Department of Pharmaceutical Sciences  
20 N. Pine Street, Room N731  
Baltimore, MD 21201  
Phone: (410) 706-5097  
Fax: (410) 706-0886  
Email: [mkane@rx.umaryland.edu](mailto:mkane@rx.umaryland.edu)

**Supplementary Material**

**Supplementary Figure list:**

**Supplementary figure 1.** Masson's trichrome images taken from 8 different NHP animals following radiation insult.

**Supplementary figure 2.** Higher magnification Masson's trichrome images taken from 4 different NHP animals.

**Supplementary figure 3.** pLSA 3D component plots from A) the whole lung sections and B) the regions of interest (ROIs).

**Supplementary figure 4.** Higher magnification images of the H&E stained sections used in the MSI study and presented with the MSI data throughout the manuscript.

**Supplementary figure 5.** Representative higher magnification images of the epithelium taken from the H&E stained sections used in the MSI study and presented with the MSI data throughout the manuscript.

**Supplementary figure 6.** Overall average spectra from the analysis of the naïve and 3 different irradiated animals presented in this study.

**Supplementary figure 7.** Representative spectra taken from the lung parenchyma of the naïve and 3 different irradiated animals used in this study.

**Supplementary figure 8.** Gross images and observations of IR2 is shown in figure A, the stained H&E section is shown in figure B, and images and overall spectra are shown for the 3 technical replicates.

**Supplementary figure 9.** MALDI-MS image of PC (16:0/16:0) at  $m/z$  734.6 and the overall average spectra of this data set. This is a different biopsy taken from IR2 to demonstrate similar pathological profiles from this lung region compared to those presented for IR2.

**Supplementary Table 1.** Table 1 lists the observed and theoretical  $m/z$ , delta  $m/z$  and error in ppm for each lipid ion.

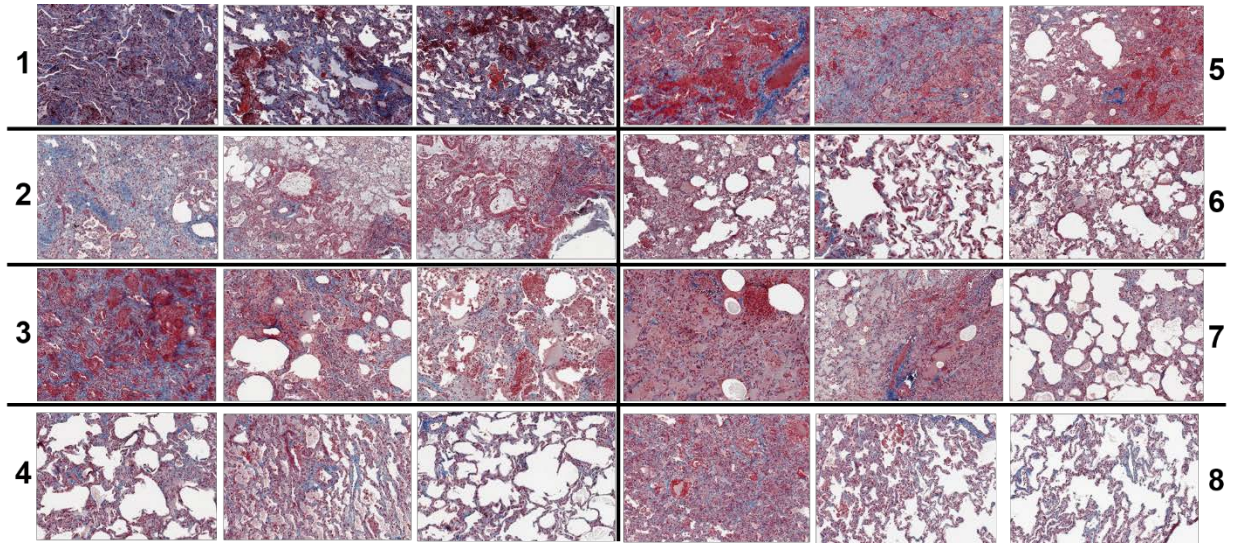

**Figure S1.** Masson's trichrome images taken from 8 different NHP animals following radiation insult. Each of the 3 images per animal are from the same biopsy section to demonstrate the complexity and heterogeneity within, and across samples, when investigating RILI models that mimic the human condition.



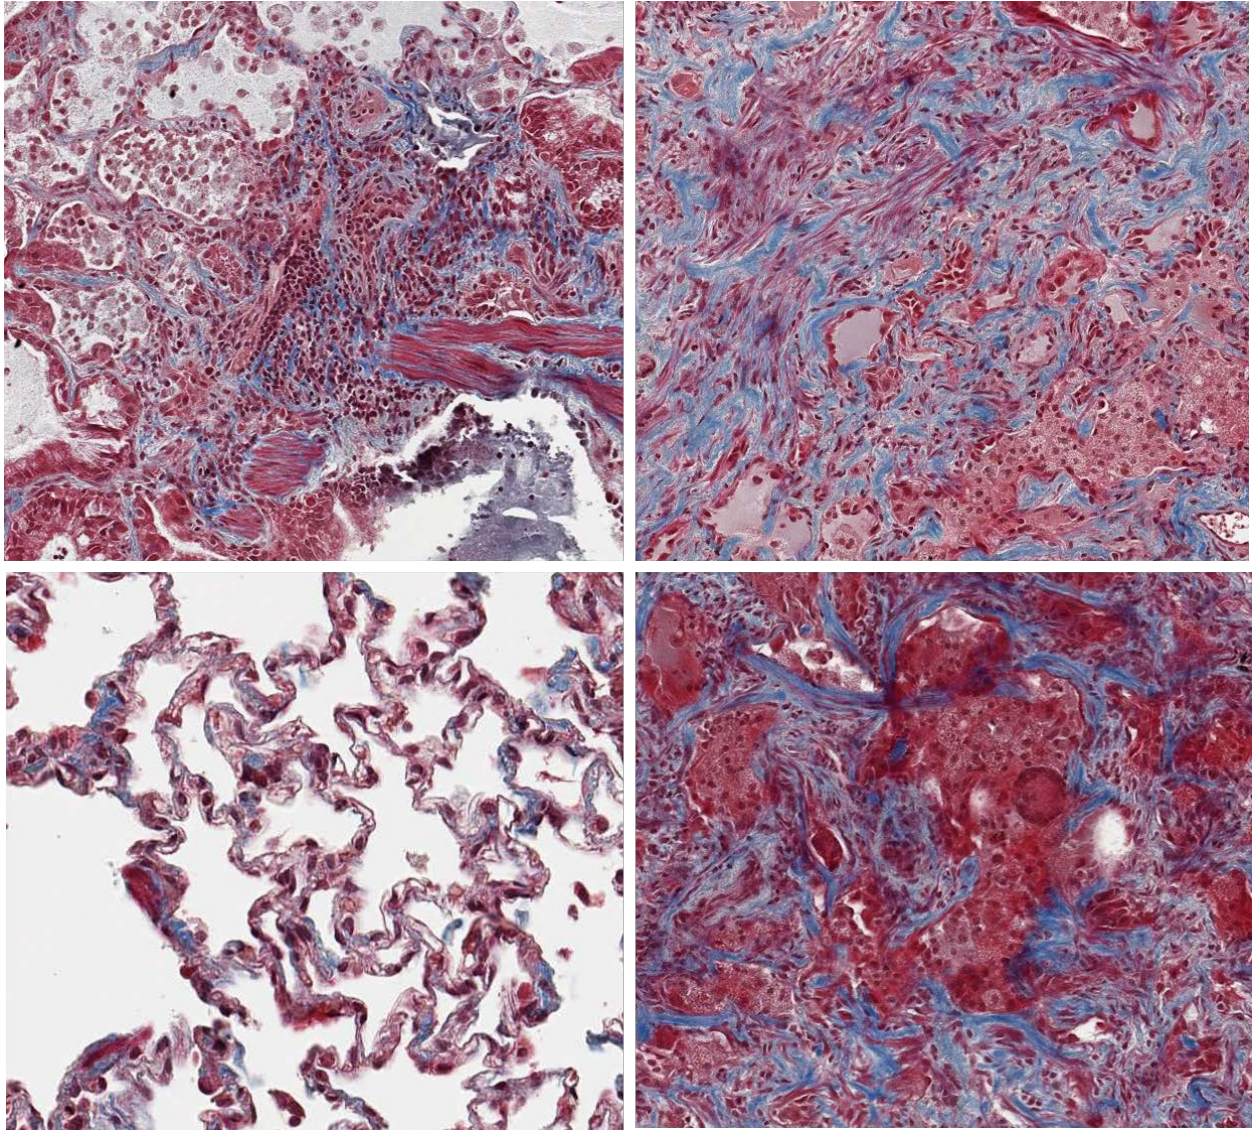

**Figure S2.** Higher magnification Masson's trichrome images taken from 4 different NHP animals to demonstrate the hypercellular nature, complexity and heterogeneity across samples, when investigating RILI models that mimic the human condition.

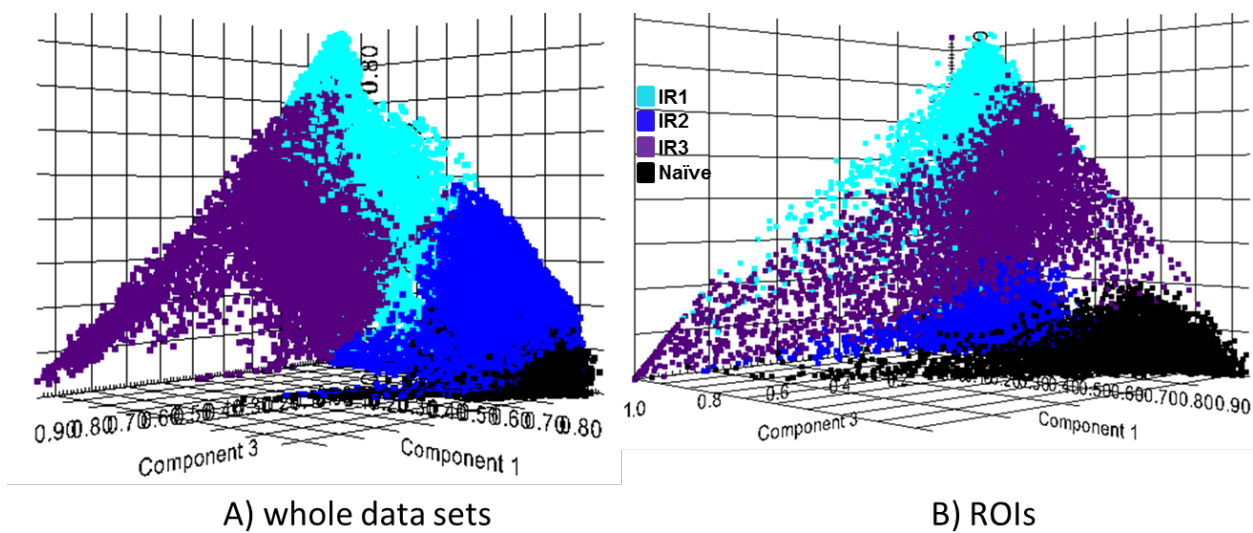

**Figure S3.** 3D pLSA component plots showing the data are separated into four clear trends for A) the whole data sets and B) regions of interest (ROIs) that compare the same number of spectra in each, ~7000.



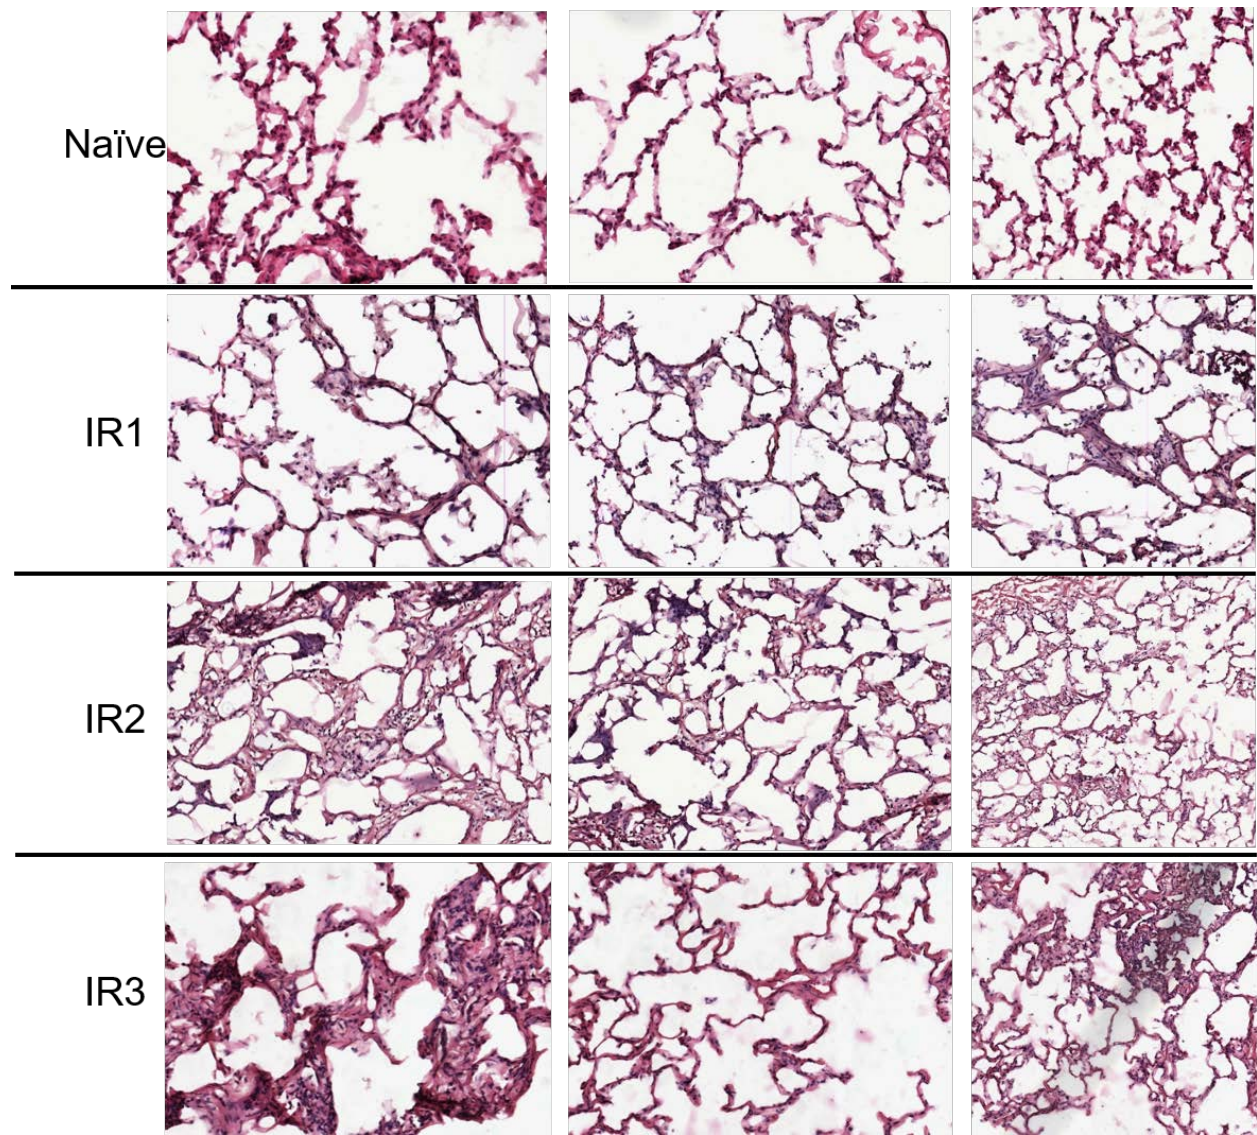

**Figure S4.** Higher magnification images of the H&E stained sections used in the MSI study and presented with the MSI data throughout the manuscript. The images show abundant nuclei and demonstrate there are no regions void of cells. Infiltrate is still evident in many alveolar regions despite the biopsies being inflated. The differences in pathologies is evident across the samples and compared to the representative naïve sample.

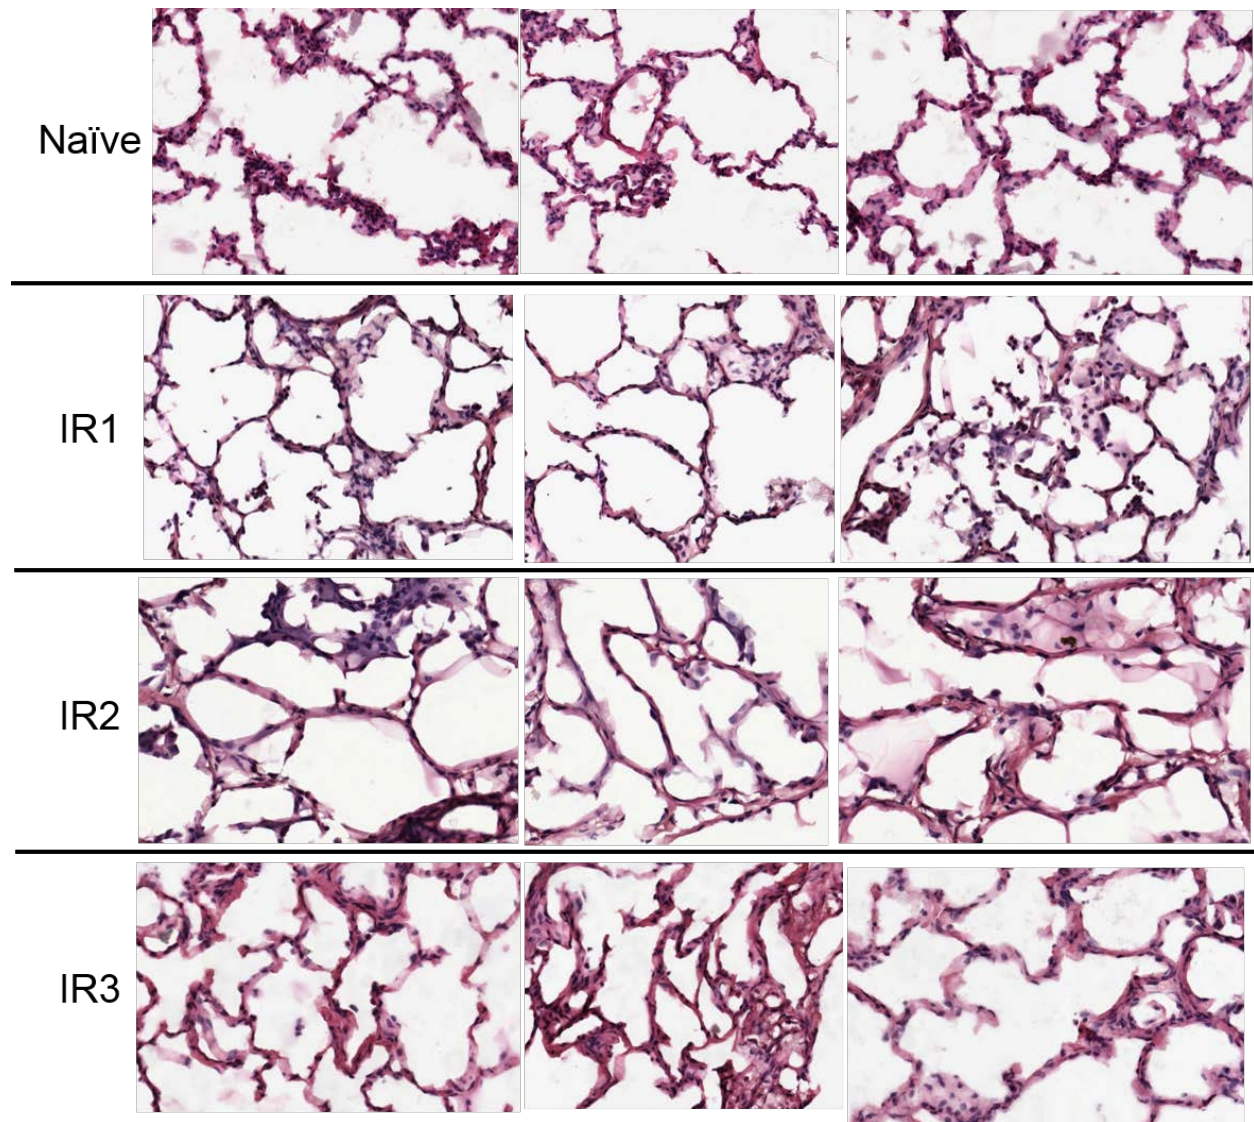

**Figure S5.** Higher magnification images of the H&E stained sections used in the MSI study and presented with the MSI data throughout the manuscript. The images show abundant nuclei and demonstrate there are no regions void of cells. Infiltrate is still evident in many alveolar regions despite the biopsies being inflated.



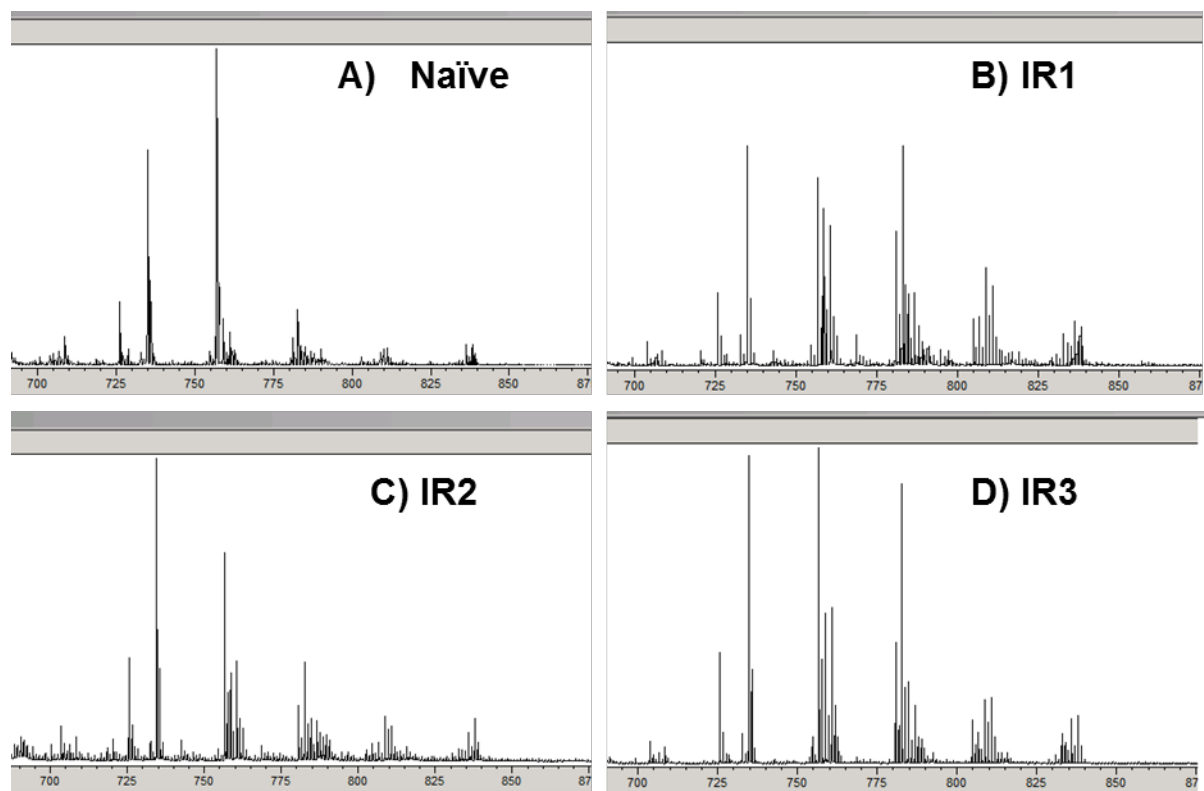

**Figure S6.** Overall average spectra from the acquisition of the naïve and 3 irradiated samples. The naïve spectrum shows the predominant ion in the lung parenchyma is due to the abundance of the surfactant lipid, PC (16:0/16:0), at  $m/z$  734.6 and 756.6. The 3 irradiated sample all show evidence of Lipidomic dysregulation in the lung parenchyma, as evident by the differences in lipid ratios compared to the naïve spectrum.



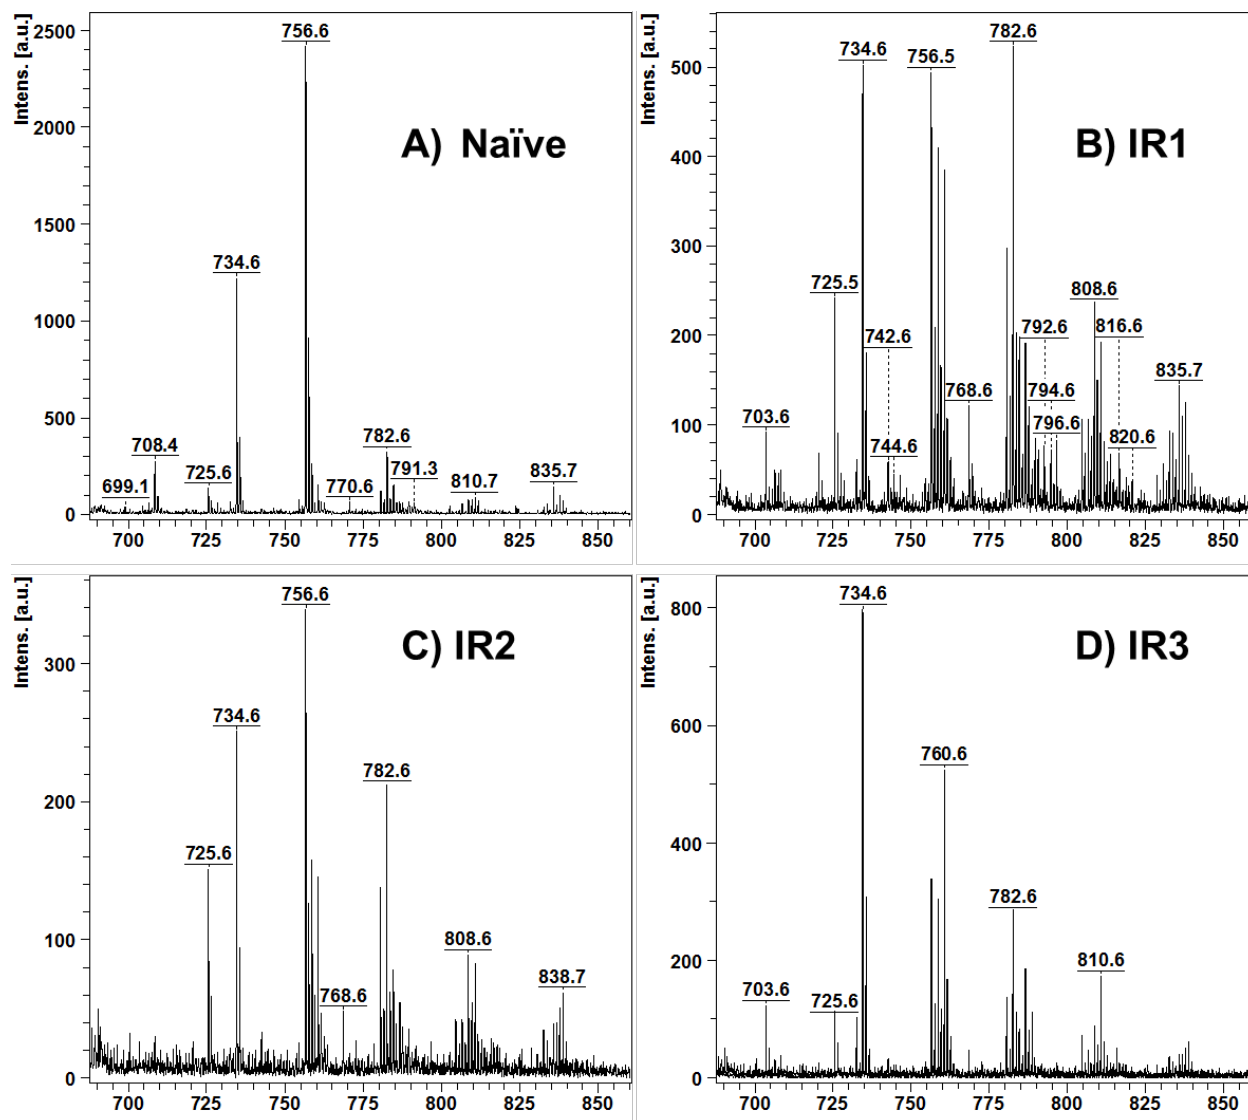

**Figure S7.** Representative spectra taken from the lung parenchyma of the naïve and 3 different irradiated samples. The dysregulated lipidomic profiles are evident in the 3 different irradiated samples compared to the naïve sample. The decrease in the abundance of the major surfactant lipid, PC (16:0/16:0), at  $m/z$  734.6 and 756.6 for the  $[M+H]^+$  and the  $[M+Na]^+$  ions is clearly demonstrated when comparing IR1, 2 and 3 to the naïve spectrum. The lipidomic ratio is also different thus providing further evidence for dysregulated lipid profiles in the lung parenchyma of the irradiated samples.

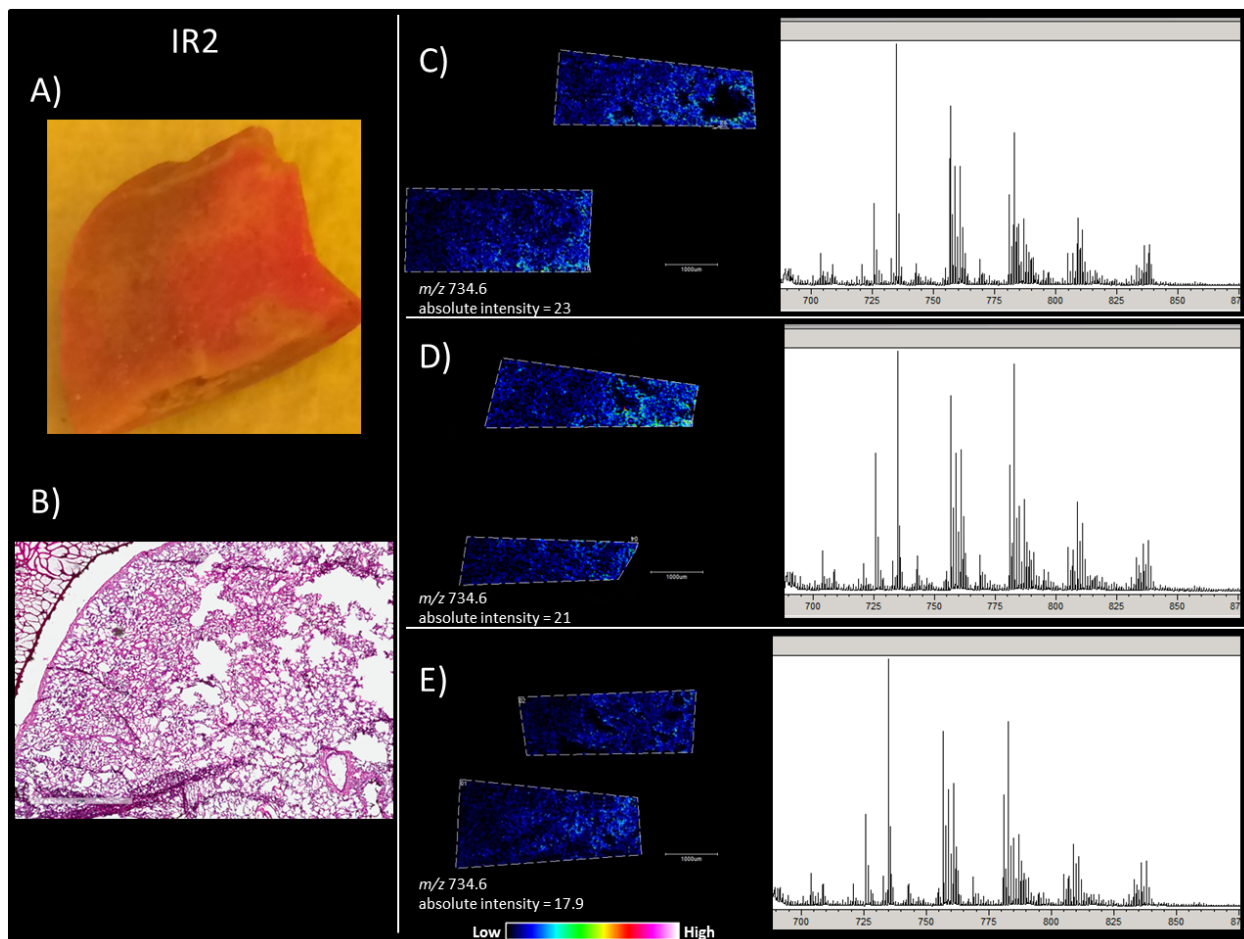

**Figure S8.** The gross image of the biopsy sample, IR2, is presented in figure S4A. Gross observation shows this lung has brown discoloration along the left and the top and bottom regions. This corresponds with dense staining and consolidation on histology, S4B. The MALDI-MS images of  $m/z$  734.6, along with the overall average spectra for 3 technical replicates of IR2, are shown in S4C-D. The images and spectra demonstrate the reproducibility in ion intensity and spectral ratios for the 3 replicates.

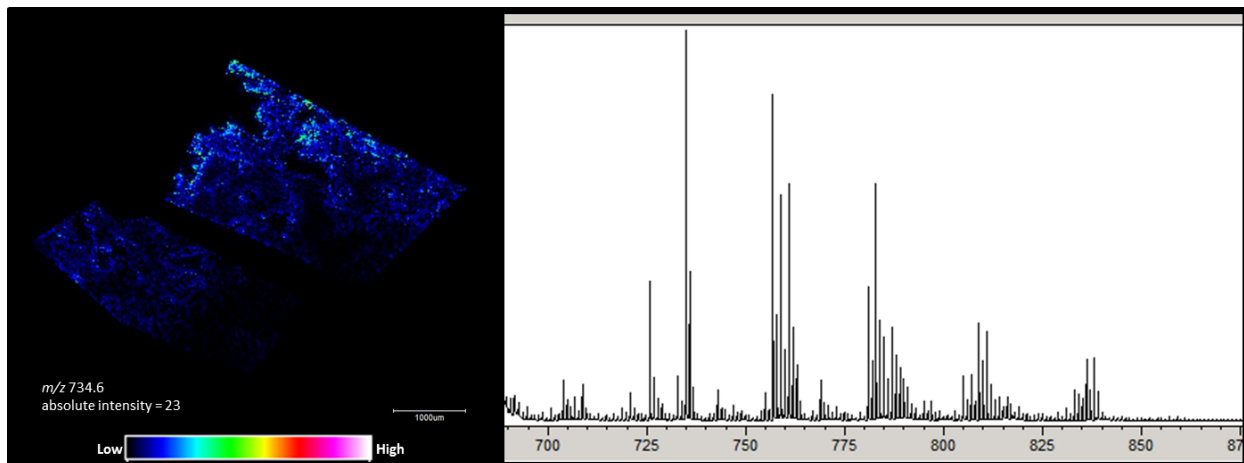

**Figure S9.** MALDI-MSI image of  $m/z$  734.6 along with the overall average spectrum from the acquisition of a second biopsy sample taken from the mid-right lobe of IR2.



| <i>m/z</i> Measured | <i>m/z</i> Theoretical | delta <i>m/z</i> | Error ppm | Tentative Lipid Identification | Ion                                         |
|---------------------|------------------------|------------------|-----------|--------------------------------|---------------------------------------------|
| 703.5817            | 703.5749               | 0.0068           | 9.69      | SM(d18:1/16:0)                 | [M+H] <sup>+</sup>                          |
| 706.5390            | 706.5381               | 0.0009           | 1.27      | PC(30:0)                       | [M+H] <sup>+</sup>                          |
| 718.5092            | 718.5017               | 0.0074           | 10.35     | PS(P-32:1)                     | [M+H] <sup>+</sup>                          |
| 720.5927            | 720.5902               | 0.0025           | 3.46      | PC(O-32:0)                     | [M+H] <sup>+</sup>                          |
| 725.5553            | 725.5568               | -0.0015          | -2.06     | SM(d18:1/16:0)                 | [M+Na] <sup>+</sup>                         |
| 728.5222            | 728.5201               | 0.0021           | 2.92      | PC(14:0/16:0)                  | [M+Na] <sup>+</sup>                         |
| 732.5612            | 732.5538               | 0.0074           | 10.09     | PC(32:1)                       | [M+H] <sup>+</sup>                          |
| 734.5708            | 734.5694               | 0.0014           | 1.85      | PC(16:0/16:0)                  | [M+H] <sup>+</sup>                          |
| 742.5744            | 742.5721               | 0.0023           | 3.08      | PC(O-32:0)                     | [M+Na] <sup>+</sup>                         |
| 754.5389            | 754.5357               | 0.0032           | 4.23      | PC(16:0/16:1)                  | [M+Na] <sup>+</sup>                         |
| 756.5525            | 756.5514               | 0.0012           | 1.54      | PC(16:0/16:0)                  | [M+Na] <sup>+</sup>                         |
| 758.5686            | 758.5694               | -0.0009          | -1.16     | PC(16:0/18:2)                  | [M+H] <sup>+</sup>                          |
| 760.5833            | 760.5851               | -0.0018          | -2.41     | PC(16:0/18:1)                  | [M+H] <sup>+</sup>                          |
| 762.6028            | 762.6007               | 0.0021           | 2.75      | PC(34:0)                       | [M+H] <sup>+</sup>                          |
| 768.5896            | 768.5878               | 0.0018           | 2.37      | PC(O-34:1)                     | [M+Na] <sup>+</sup>                         |
| 780.5524            | 780.5514               | 0.0010           | 1.25      | PC(16:0/18:2)                  | [M+Na] <sup>+</sup>                         |
| 782.5674            | 782.5670               | 0.0004           | 0.50      | PC(16:0/18:1)                  | [M+Na] <sup>+</sup>                         |
| 784.5822            | 784.5827               | -0.0005          | -0.58     | <b>PC(34:0)/PC(36:3)</b>       | <b>[M+Na]<sup>+</sup>/[M+H]<sup>+</sup></b> |
| 788.6205            | 788.6164               | 0.0041           | 5.16      | PC(36:1)                       | [M+H] <sup>+</sup>                          |
| 790.5744            | 790.5721               | 0.0023           | 2.90      | PC(O-36:4)                     | [M+Na] <sup>+</sup>                         |
| 794.6077            | 794.6034               | 0.0043           | 5.40      | PC(O-36:2)                     | [M+Na] <sup>+</sup>                         |
| 796.5900            | 796.6191               | -0.0290          | -36.45    | PC(O-36:1)                     | [M+Na] <sup>+</sup>                         |
| 802.5387            | 802.5357               | 0.0030           | 3.71      | <b>PC(36:5)/PC(38:8)</b>       | <b>[M+Na]<sup>+</sup>/[M+H]<sup>+</sup></b> |
| 804.5531            | 804.5514               | 0.0017           | 2.14      | PC(36:4)                       | [M+Na] <sup>+</sup>                         |
| 806.5724            | 806.5670               | 0.0054           | 6.66      | PC(36:3)                       | [M+Na] <sup>+</sup>                         |
| 808.5891            | 808.5827               | 0.0064           | 7.91      | PC(18:0/18:2)                  | [M+Na] <sup>+</sup>                         |
| 810.6024            | 810.5983               | 0.0041           | 5.06      | <b>PC(36:1)/PC(38:4)</b>       | <b>[M+Na]<sup>+</sup>/[M+H]<sup>+</sup></b> |
| 813.6883            | 813.6844               | 0.0038           | 4.73      | SM(d18:1/24:1)                 | [M+H] <sup>+</sup>                          |
| 815.6998            | 815.7001               | -0.0002          | -0.28     | SM(d18:1/24:0)                 | [M+H] <sup>+</sup>                          |
| 816.5870            | 816.5878               | -0.0008          | -0.98     | PC(O-38:5)                     | [M+Na] <sup>+</sup>                         |
| 818.5965            | 818.6034               | -0.0069          | -8.40     | PC(O-38:4)                     | [M+Na] <sup>+</sup>                         |
| 830.5696            | 830.5670               | 0.0026           | 3.10      | PC(38:5)                       | [M+Na] <sup>+</sup>                         |
| 832.5847            | 832.5827               | 0.0020           | 2.43      | PC(18:0/20:4)                  | [M+Na] <sup>+</sup>                         |
| 834.6038            | 834.5983               | 0.0055           | 6.57      | PC(38:3)                       | [M+Na] <sup>+</sup>                         |
| 835.6675            | 835.6663               | 0.001144         | 1.37      | SM(d18:1/24:1)                 | [M+Na] <sup>+</sup>                         |
| 837.6860            | 837.6820               | 0.004014         | 4.79      | SM(d18:1/24:0)                 | [M+Na] <sup>+</sup>                         |

**Supplementary Table 1.** Table 1 lists the observed and theoretical *m/z*, delta *m/z* and error in ppm for each lipid ion.
